# Supplementary material for: A multi-centric Study of Candida bloodstream infection in Lima-Callao, Peru: Species distribution, antifungal resistance and clinical outcomes
Source: PLoS One. 2017 Apr 18;12(4):e0175172. doi: 10.1371/journal.pone.0175172 (PMC5395148; doi:10.1371/journal.pone.0175172)
Supplement: S1 File — Microbiological information. (XLSX) [file pone.0175172.s001.xlsx]

## Sheet: ISOLATES AND SUSCEPTIBILITY
CANDIDEMIA NOVEMBER 2013 TO JANUARY 2015, ALMENARA - DOS DE MAYO Y SABOGAL HOSPITAL
NACIONAL GUILLERMO ALMENARA IRIGOYEN HOSPITAL										DOS DE MAYO HOSPITAL										SABOGAL HOSPITAL
N°	Hospital of origin.	Hospital identification	Species	susceptibility						N°	Hospital of origin.	Hospital identification	Species	susceptibility						N°	Hospital of origin.	Hospital identification	Species	susceptibility
				anidulafungina	voriconazol	anfo.b	fluconazol	posaconazol						anidulafungina	voriconazol	anfo.b	fluconazol	posaconazol						anidulafungina	voriconazol	anfo.b	fluconazol	posaconazol
65	HNGAI	C. parapsilosis	C. parapsilosis	0.03	0.03	0.25	2	0.03		1	H. DOS DE MAYO	C. spp	C. glabrata	0.03	0.125	0.25	4	0.25		1	H. SABOGAL	C. tropicalis	C. tropicalis	0.03	0.03	0.5	0.125	0.03
66	HNGAI	C. parapsilosis	C. parapsilosis	1	0.03	1	0.5	0.06		2	H. DOS DE MAYO	C. spp	C. lusitanie	0.03	0.03	0.125	0.125	0.03		2	H. SABOGAL	C. albicans	C. albicans	0.03	0.03	0.5	0.125	0.03
67	HNGAI	C. parapsilosis	C. parapsilosis	1	0.03	0.5	0.25	0.03		3	H. DOS DE MAYO	C. spp	C. parapsilosis	1	0.03	0.25	0.5	0.03		3	H. SABOGAL	C. parapsilosis	C. guillermondii	1	0.03	0.125	2	0.03
68	HNGAI	C. spp	C. albicans	0.03	0.03	0.5	0.25	0.03		4	H. DOS DE MAYO	C. krusei	C. parapsilosis	0.5	0.03	0.25	0.25	0.03		4	H. SABOGAL	C. guillermondii	C. guillermondii	1	0.03	0.06	1	0.03
69	HNGAI	C. parapsilosis	C. parapsilosis	0.125	0.03	0.5	0.25	0.03		5	H. DOS DE MAYO	C. tropicalis	C. tropicalis	0.03	0.03	1	0.25	0.03		5	H. SABOGAL	C. parapsilosis	C. tropicalis	0.03	0.03	0.25	0.25	0.03
70	HNGAI	C. albicans	C. albicans	0.03	0.03	0.25	0.25	0.125		6	H. DOS DE MAYO	C. albicans	C. tropicalis	0.06	0.06	1	0.5	0.125		6	H. SABOGAL	C. glabrata	C. glabrata	0.03	0.125	0.125	1	0.25
71	HNGAI	C. tropicalis	C.tropicalis	0.03	0.03	0.5	0.125	0.03		7	H. DOS DE MAYO	C. tropicalis	C. tropicalis	0.03	0.03	1	0.25	0.06		7	H. SABOGAL	C. tropicalis	C. tropicalis	0.03	0.03	0.25	0.5	0.06
72	HNGAI	C. lipolytica	C. lipolytica	0.125	0.03	0.25	1	0.03		8	H. DOS DE MAYO	C. albicans	C. albicans	0.03	0.03	0.25	0.125	0.03		8	H. SABOGAL	C. parapsilosis	C. parapsilosis	1	0.125	0.125	16	0.03
73	HNGAI	C. albicans	C. albicans	0.03	0.03	0.5	0.25	0.03		9	H. DOS DE MAYO	C. albicans	C. tropicalis	0.03	0.03	0.5	0.25	0.03		9	H. SABOGAL	C. albicans	C. albicans	0.03	0.03	0.25	0.25	0.03
74	HNGAI	C. parapsilosis	C. parapsilosis	1	0.03	0.5	0.25	0.03		10	H. DOS DE MAYO	C. tropicalis	C. tropicalis	0.03	0.03	1	0.5	0.03		10	H. SABOGAL	C. parapsilosis	C. parapsilosis	0.5	0.125	0.125	4	0.03
75	HNGAI	C. parapsilosis	C. parapsilosis	2	0.03	1	1	0.03		11	H. DOS DE MAYO	C. lusitaniae	C. lusitanie	0.06	0.03	0.5	0.125	0.03		11	H. SABOGAL	C. parapsilosis	C. parapsilosis	0.5	0.03	0.125	8	0.03
76	HNGAI	C. parapsilosis	C. parapsilosis	0.25	0.03	0.25	0.25	0.06		12	H. DOS DE MAYO	C. albicans	C. albicans	0.03	0.03	0.5	0.5	0.03		12	H. SABOGAL	C. tropicalis	C. tropicalis	0.03	0.125	0.5	1	0.03
77	HNGAI	C. spp	C.tropicalis	0.03	0.03	0.5	0.25	0.03		13	H. DOS DE MAYO	C. tropicalis	C. tropicalis	0.03	0.03	0.5	0.125	0.03		13	H. SABOGAL	C. tropicalis	C. tropicalis	0.03	0.125	0.5	1	0.03
78	HNGAI	C. albicans	C. albicans	0.03	0.03	0.5	0.125	0.03		14	H. DOS DE MAYO	C. albicans	C. albicans	0.03	0.125	0.5	2	0.03		14	H. SABOGAL	C. parapsilosis	C. tropicalis	0.03	0.03	0.25	0.25	0.03
79	HNGAI	C. spp	C. parapsilosis	1	0.03	0.5	1	0.03		15	H. DOS DE MAYO	C. tropicalis	C. tropicalis	0.03	0.03	1	0.5	0.125		15	H. SABOGAL	C. parapsilosis	C. albicans	0.03	0.03	0.25	0.125	0.03
80	HNGAI	C. spp	C. glabrata	0.03	0.03	0.5	1	0.03		16	H. DOS DE MAYO	C. parapsilosis	C. parapsilosis	0.5	0.03	0.5	0.25	0.25		16	H. SABOGAL	C. albicans	C. albicans	0.03	0.03	0.125	0.25	0.03
81	HNGAI	C. spp	C. glabrata	0.03	0.03	0.5	2	0.5		17	H. DOS DE MAYO	C. parapsilosis	C. parapsilosis	1	0.03	0.5	0.25	0.03		17	H. SABOGAL	C. guillermondii	C. guillermondii	1	0.03	0.06	1	0.06
82	HNGAI	C. parapsilosis	C. parapsilosis	2	0.03	0.5	0.5	0.03		18	H. DOS DE MAYO	C. tropicalis	C. tropicalis	0.03	0.03	0.5	0.25	0.03		18	H. SABOGAL	C. albicans	C. albicans	0.03	0.03	0.25	0.125	0.03
83	HNGAI	C. parapsilosis	C. parapsilosis	1	0.03	0.25	0.5	0.03		19	H. DOS DE MAYO	C. albicans	C. albicans	0.03	0.03	0.125	0.125	0.03		19	H. SABOGAL	C. albicans	C. guillermondii	1	0.03	0.06	0.5	0.125
84	HNGAI	C. tropicalis	C.tropicalis	0.03	0.03	0.5	0.25	0.03		20	H. DOS DE MAYO	C. parapsilosis	C. parapsilosis	2	0.03	0.25	2	0.06		20	H. SABOGAL	C. parapsilosis	C. parapsilosis	1	0.03	0.25	0.125	0.03
85	HNGAI	C. tropicalis	C. albicans	0.03	0.03	0.5	0.125	0.03		21	H. DOS DE MAYO	C. albicans	C. albicans	0.03	0.03	0.5	0.25	0.03		21	H. SABOGAL	C. albicans	C. albicans	0.03	0.03	0.5	0.125	0.03
86	HNGAI	C. albicans	C. albicans	0.03	0.03	0.25	0.25	0.03		22	H. DOS DE MAYO	C. albicans	C. albicans	0.03	0.03	0.5	0.125	0.03		22	H. SABOGAL	C. glabrata	C. glabrata	0.03	0.03	0.5	1	0.25
87	HNGAI	C. albicans	C. albicans	0.03	0.03	0.25	0.5	0.03		23	H. DOS DE MAYO	C. albicans	C. albicans	0.03	0.03	0.5	0.25	0.03		23	H. SABOGAL	C. spp	C. parapsilosis	1	0.03	0.25	0.5	0.03
88	HNGAI	C. tropicalis	C. tropicalis	0.03	0.03	0.5	0.25	0.06		24	H. DOS DE MAYO	C. tropicalis	C. tropicalis	0.03	0.03	0.5	0.25	0.06		24	H. SABOGAL	C. parapsilosis	C. parapsilosis	1	0.03	0.5	0.5	0.06
89	HNGAI	C. albicans	C. albicans	0.03	0.03	0.5	0.125	0.03		25	H. DOS DE MAYO	C. tropicalis	C. tropicalis	0.03	0.03	0.5	0.5	0.03		25	H. SABOGAL	C. glabrata	C. glabrata	0.03	0.06	0.25	1	0.25
90	HNGAI	C. albicans	C. albicans	0.03	0.03	0.25	0.125	0.03		26	H. DOS DE MAYO	C. glabrata	C. glabrata	0.03	0.06	0.5	2	0.25		26	H. SABOGAL	C. albicans	C. guillermondii	1	0.03	0.25	0.5	0.06
91	HNGAI	C. spp	C. glabrata	0.03	0.03	0.25	0.5	0.25		27	H. DOS DE MAYO	C. glabrata	C. albicans	0.03	0.03	0.5	0.125	0.03		27	H. SABOGAL	C. parapsilosis	C. parapsilosis	0.25	0.03	0.25	0.5	0.06
92	HNGAI	C. spp	C. glabrata	0.03	0.03	0.5	0.5	0.25		28	H. DOS DE MAYO	C. spp	C. guillesmondii	0.06	0.06	0.25	4	0.25		28	H. SABOGAL	C. parapsilosis	C. parapsilosis	1	0.03	0.5	0.5	0.03
93	HNGAI	C. albicans	C. albicans	0.03	0.03	0.5	0.125	0.03		29	H. DOS DE MAYO	C. tropicalis	C. tropicalis	0.03	0.03	0.5	0.25	0.06		29	H. SABOGAL	C. parapsilosis	C. parapsilosis	0.03	0.03	0.5	0.25	0.06
94	HNGAI	C. tropicalis	C. albicans	0.03	0.03	0.5	0.125	0.03		30	H. DOS DE MAYO	C. tropicalis	C. tropicalis	0.03	0.03	0.5	0.25	0.06
95	HNGAI	C. tropicalis	C. tropicalis	0.03	0.03	0.5	0.25	0.03
96	HNGAI	C. spp	C. parapsilosis	1	0.03	0.5	0.25	0.03
97	HNGAI	C. spp	C. albicans	0.03	0.03	0.5	16	0.25
98	HNGAI	C. spp	C. tropicalis	0.03	0.03	0.5	0.25	0.03
99	HNGAI	C. spp	C. glabrata	0.03	0.03	0.125	1	0.03
100	HNGAI	C. albicans	C. albicans	0.03	0.25	0.5	4	0.25
63-A	HNGAI	C. glabrata	C. glabrata	0.03	0.03	0.5	0.5	0.03
86-A	HNGAI	C. albicans	C. albicans	0.03	0.03	0.25	0.25	0.03
95-A	HNGAI	C. albicans	C. tropicalis	0.03	0.03	0.5	0.5	0.03
101	HNGAI	C. spp	C. albicans	0.03	0.03	0.25	0.25	0.03
102	HNGAI	C. spp	C. glabrata	0.03	0.03	0.25	2	0.03
103	HNGAI	C. albicans	C. albicans	0.03	0.03	0.5	0.25	0.03
104	HNGAI	C. albicans	C. albicans	0.03	0.03	0.5	0.25	0.03
105	HNGAI	C. albicans	C. albicans	0.03	0.03	0.5	0.125	0.03
106	HNGAI	C. albicans	C. albicans	0.03	0.03	0.25	0.25	0.03
107	HNGAI	C. albicans	C. albicans	0.03	0.03	0.5	0.25	0.03
108	HNGAI	C. parapsilosis	C. parapsilosis	0.5	0.03	0.5	0.125	0.03
109	HNGAI	C. tropicalis	C. tropicalis	0.03	0.03	0.5	0.25	0.03
110	HNGAI	C. albicans	C. albicans	0.03	0.03	0.5	0.25	0.03
111	HNGAI	C. tropicalis	C. parapsilosis	0.5	0.03	0.25	0.5	0.03
112	HNGAI	C. lipolytica	C. lipolytica	0.125	0.03	0.25	2	0.25
113	HNGAI	C. tropicalis	C. tropicalis	0.03	0.03	0.5	0.125	0.03
114	HNGAI	C. spp	C. guillermondii	1	0.03	0.06	1	0.125
115	HNGAI	C. albicans	C. albicans	0.03	0.03	0.5	1	0.03
116	HNGAI	C. guillermondii	C. guillermondii	1	0.03	0.25	1	0.03
117	HNGAI	C. tropicalis	C. tropicalis	0.03	0.03	1	0.5	0.06
118	HNGAI	C. parapsilosis	C. parapsilosis	0.5	0.03	0.5	0.5	0.03
119	HNGAI	C. glabrata	C. glabrata	0.03	0.125	0.125	4	0.125
120	HNGAI	C. tropicalis	C. tropicalis	0.03	0.06	0.5	0.5	0.03
121	HNGAI	C. lipolytica	C. lipolytica	0.125	0.03	0.5	1	0.25
122	HNGAI	C. spp	C. parapsilosis	0.5	0.03	0.5	0.25	0.03
123	HNGAI	C. spp	C. tropicalis	0.03	0.03	0.25	0.5	0.03
124	HNGAI	C. spp	C. parapsilosis	0.5	0.03	0.25	0.25	0.03
125	HNGAI	C. guillermondii	C. guillermondii	0.125	0.03	0.25	1	0.125
126	HNGAI	C. tropicalis	C. tropicalis	0.03	0.03	0.5	0.125	0.03
127	HNGAI	C. tropicalis	C. tropicalis	0.03	0.03	0.5	0.25	0.03
128	HNGAI	C. tropicalis	C. tropicalis	0.03	0.03	0.5	0.125	0.03
129	HNGAI	C. spp	C. parapsilosis	2	0.03	0.5	0.5	0.03
130	HNGAI	C. spp	C. albicans	0.03	0.03	0.5	0.125	0.03
131	HNGAI	C. spp	C. krusei	0.03	0.125	1	8	0.03
132	HNGAI	C. spp	C. parapsilosis	0.03	0.03	0.5	32	0.03
133	HNGAI	C. spp	C. albicans	1	0.03	0.25	0.5	0.03
134	HNGAI	C. guillermondii	C. guillermondii	0.03	0.03	0.25	2	0.25
135	HNGAI	C. albicans	C. albicans	0.03	0.03	0.25	0.25	0.06
136	HNGAI	C.spp	C. parapsilosis	1	0.03	0.5	0.5	0.06
137	HNGAI	C. spp	C. lipolytica	0.03	0.03	0.25	2	0.5
138	HNGAI	C. parapsilosis	C. parapsilosis	1	0.03	0.25	0.125	0.03
139	HNGAI	C. spp	C. parapsilosis	0.5	0.03	0.25	0.25	0.03
140	HNGAI	C. tropicalis	C. tropicalis	0.03	0.03	0.25	0.25	0.03
141	HNGAI	C. albicans	C. albicans	0.03	0.03	0.5	0.125	0.03
142	HNGAI	C. parapsilosis	C. parapsilosis	0.5	0.03	0.25	0.25	0.03
143	HNGAI	C. tropicalis	C. tropicalis	0.03	0.03	0.25	0.125	0.03
144	HNGAI	C.spp	C. parapsilosis	0.125	0.03	0.25	0.5	0.03
145	HNGAI	C. spp	C. lipolytica	0.25	0.03	0.25	1	0.25
146	HNGAI	C.spp	C. guillermondii	1	0.03	0.5	1	0.06
147	HNGAI	C. albicans	C. albicans	0.03	0.03	0.125	0.125	0.03
148	HNGAI	C.spp	C. glabrata	0.03	0.06	0.25	2	0.25
149	HNGAI	C. spp	C. tropicalis	0.03	0.03	0.5	0.125	0.03
150	HNGAI	C. tropicalis	C. tropicalis	0.03	0.03	0.5	0.5	0.03
151	HNGAI	C. glabrata	C. glabrata	1	0.03	0.5	1	0.06
152	HNGAI	C. albicans	C. albicans	0.03	0.03	0.5	0.125	0.03
153	HNGAI	C. parapsilosis	C. parapsilosis	1	0.03	0.25	0.5	0.06
154	HNGAI	C. parapsilosis	C. parapsilosis	0.03	0.03	0.5	0.5	0.03
155	HNGAI	C.spp	C. tropicalis	0.03	0.03	0.5	0.25	0.06
156	HNGAI	C.spp	C. albicans	0.03	0.03	0.5	0.125	0.03
157	HNGAI	C.spp	C. tropicalis	0.03	0.03	1	0.125	0.03
158	HNGAI	C.spp	C. albicans	0.03	0.03	0.5	0.125	0.03
159	HNGAI	C.spp	C. lipolytica	0.06	0.03	0.5	1	0.03
160	HNGAI	C.spp	C. albicans	0.03	0.03	0.5	0.125	0.03
